# Supplementary material
Source: HighWire-hosted journal article supplement (https://bmjopen.bmj.com/content/11/8/e045572)
Supplement: inline-supplementary-material-6 [file inline-supplementary-material-6.pdf]

**Supplemental Figure 3.** Meta-analytic summary of predictor estimates in the respective study data subset obtained from a single multiple imputed dataset.

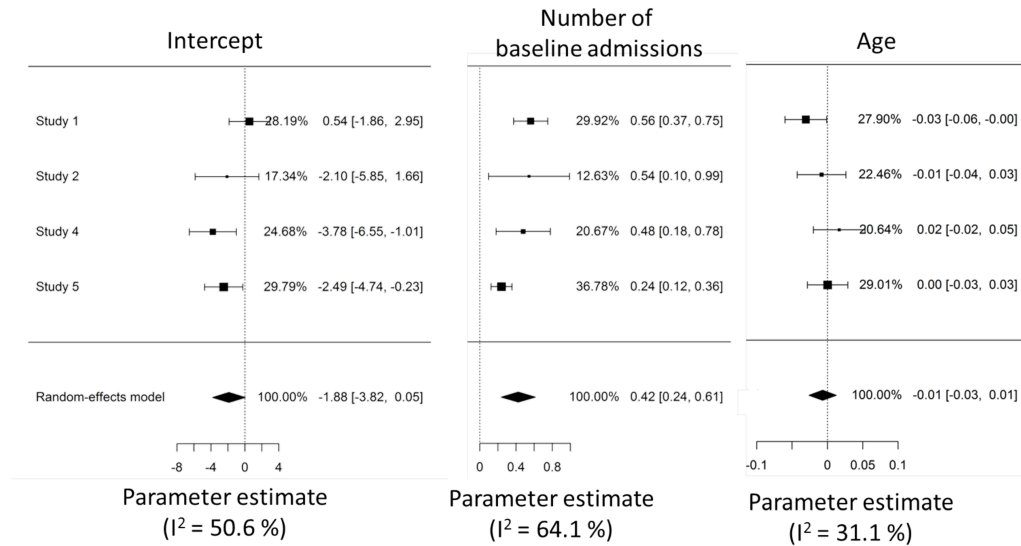

Study 1: ISCOPE; study 2: Opti-med; study 4: PRIMUM; study 5: RIME
